# Supplementary material
Source: MDPI journal article supplement (https://www.mdpi.com/2073-4433/12/2/268)
Supplement: s1 [file s1]

## Sheet: Sheet1
												Doses [SED]
	Index	Date	Place	Latitude	Longitude	Activity	Start time	End time	Posture	Anatomic zone	ER	Dosimeter	Satellite (ambient)	Satellite (personal)
	1	2008-03-15	Vercorin	46.2394	7.52762	Skier	10:00:00	13:10:00	Standing moving	Forehead	0.457122	3.1	9.01823	4.12243
	2	2008-03-15	Vercorin	46.2394	7.52762	Skier	10:00:00	12:30:00	Standing moving	Forehead	0.457122	2.4	7.1399	3.2638
	3	2008-03-15	Vercorin	46.2394	7.52762	Skier	10:30:00	16:30:00	Standing moving	Forehead	0.457122	5.5	11.6005	5.30286
	4	2008-03-15	Vercorin	46.2394	7.52762	Skier	10:00:00	13:15:00	Standing moving	Forehead	0.457122	2.3	9.08805	4.15435
	5	2008-03-15	Vercorin	46.2394	7.52762	Skier	10:00:00	13:00:00	Standing moving	Forehead	0.457122	4.7	8.87859	4.0586
	6	2008-03-15	Vercorin	46.2394	7.52762	Skier	10:00:00	16:45:00	Standing moving	Forehead	0.457122	4.6	12.9682	5.92804
	7	2008-03-15	Vercorin	46.2394	7.52762	Skier	10:00:00	16:15:00	Standing moving	Forehead	0.457122	3.5	12.7937	5.8483
	8	2008-03-15	Vercorin	46.2394	7.52762	Skier	10:00:00	12:30:00	Standing moving	Forehead	0.457122	2.4	7.1399	3.2638
	9	2008-03-15	Vercorin	46.2394	7.52762	Skier	10:00:00	13:00:00	Standing moving	Forehead	0.457122	2.7	8.87859	4.0586
	10	2008-03-15	Vercorin	46.2394	7.52762	Skier	10:00:00	14:00:00	Standing moving	Forehead	0.457122	3.8	9.71644	4.4416
	11	2008-03-15	Vercorin	46.2394	7.52762	Skier	10:00:00	12:15:00	Standing moving	Forehead	0.457122	2.5	6.27056	2.86641
	12	2008-03-15	Vercorin	46.2394	7.52762	Skier	10:30:00	16:30:00	Standing moving	Forehead	0.457122	5.7	11.6005	5.30286
	13	2008-03-15	Vercorin	46.2394	7.52762	Skier	10:00:00	12:45:00	Standing moving	Forehead	0.457122	3	8.00925	3.6612
	14	2008-04-05	Vercorin	46.2394	7.52762	Skier	10:35:00	16:30:00	Standing moving	Forehead	0.44302	5.9	24.4372	10.8262
	15	2008-04-05	Montana	46.3344	7.49297	Skier	09:25:00	16:10:00	Standing moving	Forehead	0.443192	3.6	20.0768	8.89786
	16	2008-04-05	Montana	46.3344	7.49297	Skier	09:20:00	16:20:00	Standing moving	Forehead	0.443192	3.2	20.508	9.08898
	17	2008-04-05	Montana	46.3344	7.49297	Skier	08:30:00	16:45:00	Standing moving	Forehead	0.443192	5.1	21.8721	9.69355
	18	2008-04-05	Montana	46.3344	7.49297	Skier	09:38:00	16:12:00	Standing moving	Forehead	0.443192	1.9	19.9385	8.83661
	19	2008-04-05	Montana	46.3344	7.49297	Skier	09:20:00	15:45:00	Standing moving	Forehead	0.443192	2.9	19.0727	8.45288
	20	2008-04-05	Montana	46.3344	7.49297	Skier	08:20:00	16:20:00	Standing moving	Forehead	0.443192	3.1	21.0497	9.32907
	21	2008-04-05	Montana	46.3344	7.49297	Skier	09:15:00	16:00:00	Standing moving	Forehead	0.443192	4.1	19.886	8.81332
	22	2008-04-05	Nendaz	46.1617	7.28336	Skier	09:00:00	15:05:00	Standing moving	Forehead	0.442878	2.8	16.9821	7.52099
	23	2008-04-05	Nendaz	46.1617	7.28336	Skier	09:00:00	15:00:00	Standing moving	Forehead	0.442878	4.9	16.7887	7.43535
	24	2008-04-05	Nendaz	46.1617	7.28336	Skier	09:00:00	15:00:00	Standing moving	Forehead	0.442878	0.9	16.7887	7.43535
	25	2008-04-05	Nendaz	46.1617	7.28336	Skier	09:00:00	15:00:00	Standing moving	Forehead	0.442878	3.1	16.7887	7.43535
	26	2008-04-05	Nendaz	46.1617	7.28336	Skier	09:00:00	15:00:00	Standing moving	Forehead	0.442878	4.5	16.7887	7.43535
	27	2008-04-05	Nendaz	46.1617	7.28336	Skier	09:00:00	15:00:00	Standing moving	Forehead	0.442878	7.1	16.7887	7.43535
	28	2008-04-05	Nendaz	46.1617	7.28336	Skier	09:00:00	15:00:00	Standing moving	Forehead	0.442878	4.8	16.7887	7.43535
	29	2008-04-05	Nendaz	46.1617	7.28336	Skier	09:00:00	15:00:00	Standing moving	Forehead	0.442878	1.4	16.7887	7.43535
	30	2008-04-05	Nendaz	46.1617	7.28336	Skier	09:20:00	15:00:00	Standing moving	Forehead	0.442878	5	16.3929	7.26007
	31	2008-04-05	Nendaz	46.1617	7.28336	Skier	09:00:00	15:00:00	Standing moving	Forehead	0.442878	6.9	16.7887	7.43535
	32	2005-07-21	Chandolin	46.252	7.59764	Building	10:40:00	12:00:00	Standing moving	Left shoulder	0.582451	0.6	7.01079	4.08344
	33	2005-07-21	Chandolin	46.252	7.59764	Building	10:40:00	12:00:00	Standing moving	Low back	0.517519	1.616	7.01079	3.62822
	34	2005-07-21	Chandolin	46.252	7.59764	Building	10:40:00	12:00:00	Standing moving	Neck	0.629342	3.2512	7.01079	4.41218
	35	2005-07-21	Chandolin	46.252	7.59764	Building	10:40:00	12:00:00	Standing moving	Right shoulder	0.582451	0	7.01079	4.08344
	36	2005-07-21	Chandolin	46.252	7.59764	Building	13:17:00	14:20:00	Standing moving	Neck	0.629342	1.356	7.92197	4.98563
	37	2005-07-21	Chandolin	46.252	7.59764	Building	13:17:00	14:20:00	Standing moving	Right shoulder	0.582451	0.244	7.92197	4.61416
	38	2005-07-21	Chandolin	46.252	7.59764	Building	13:17:00	14:20:00	Standing moving	Low back	0.517519	1.456	7.92197	4.09977
	39	2005-07-21	Chandolin	46.252	7.59764	Building	13:17:00	14:20:00	Standing moving	Left shoulder	0.582451	0.048	7.92197	4.61416
	40	2005-07-21	Chandolin	46.252	7.59764	Building	13:17:00	14:20:00	Standing moving	Forehead	0.416982	0.86	7.92197	3.30332
	41	2005-07-21	Chandolin	46.252	7.59764	Building	13:15:00	14:20:00	Standing moving	Left shoulder	0.582451	0.86	8.1789	4.76381
	42	2005-07-21	Chandolin	46.252	7.59764	Building	13:15:00	14:20:00	Standing moving	Neck	0.629342	1.552	8.1789	5.14733
	43	2005-07-21	Chandolin	46.252	7.59764	Building	13:15:00	14:20:00	Standing moving	Forehead	0.416982	2.448	8.1789	3.41045
	44	2005-07-21	Chandolin	46.252	7.59764	Building	13:15:00	14:20:00	Standing moving	Right shoulder	0.582451	1.244	8.1789	4.76381
	45	2005-07-21	Chandolin	46.252	7.59764	Building	13:15:00	14:20:00	Standing moving	Low back	0.517519	0.724	8.1789	4.23274
	46	2005-07-21	Chandolin	46.252	7.59764	Building	13:20:00	14:20:00	Standing moving	Left shoulder	0.582451	1.076	7.53658	4.38969
	47	2005-07-21	Chandolin	46.252	7.59764	Building	13:20:00	14:20:00	Standing moving	Right shoulder	0.582451	0.6	7.53658	4.38969
	48	2005-07-21	Chandolin	46.252	7.59764	Building	13:20:00	14:20:00	Standing moving	Neck	0.629342	3.252	7.53658	4.74309
	49	2005-07-21	Chandolin	46.252	7.59764	Building	13:20:00	14:20:00	Standing moving	Low back	0.517519	2.944	7.53658	3.90032
	50	2005-07-21	Chandolin	46.252	7.59764	Building	13:20:00	14:20:00	Standing moving	Forehead	0.416982	2.088	7.53658	3.14261
	51	2005-07-21	Chandolin	46.252	7.59764	Building	09:20:00	12:00:00	Standing moving	Forehead	0.416982	3.64	11.1737	4.65921
	52	2005-07-21	Chandolin	46.252	7.59764	Building	09:20:00	12:00:00	Standing moving	Right shoulder	0.582451	0.736	11.1737	6.50811
	53	2005-07-21	Chandolin	46.252	7.59764	Building	09:20:00	12:00:00	Standing moving	Left shoulder	0.582451	0.196	11.1737	6.50811
	54	2005-07-21	Chandolin	46.252	7.59764	Building	09:20:00	12:00:00	Standing moving	Neck	0.629342	1.056	11.1737	7.03205
	55	2005-07-21	Chandolin	46.252	7.59764	Building	09:20:00	12:00:00	Standing moving	Low back	0.517519	0.064	11.1737	5.78258
	56	2005-07-18	Chandolin	46.252	7.59764	Building	09:30:00	11:27:00	Standing moving	Right shoulder	0.58152	4.616	6.58712	3.83054
	57	2005-07-18	Chandolin	46.252	7.59764	Building	09:30:00	11:27:00	Standing moving	Neck	0.628411	0	6.58712	4.13942
	58	2005-07-18	Chandolin	46.252	7.59764	Building	09:30:00	11:27:00	Standing moving	Left shoulder	0.58152	2.088	6.58712	3.83054
	59	2005-07-18	Chandolin	46.252	7.59764	Building	09:30:00	11:27:00	Standing moving	Low back	0.516588	0	6.58712	3.40283
	60	2005-07-18	Chandolin	46.252	7.59764	Building	09:30:00	11:27:00	Standing moving	Forehead	0.41605	2.088	6.58712	2.74057
	61	2005-07-18	Chandolin	46.252	7.59764	Building	09:30:00	11:27:00	Standing moving	Left shoulder	0.58152	0.244	6.58712	3.83054
	62	2005-07-18	Chandolin	46.252	7.59764	Building	09:30:00	11:27:00	Standing moving	Neck	0.628411	1.044	6.58712	4.13942
	63	2005-07-18	Chandolin	46.252	7.59764	Building	09:30:00	11:27:00	Standing moving	Right shoulder	0.58152	2.552	6.58712	3.83054
	64	2005-07-18	Chandolin	46.252	7.59764	Building	09:30:00	11:27:00	Standing moving	Forehead	0.41605	0	6.58712	2.74057
	65	2005-08-05	Verbier	46.0993	7.22975	Building	10:08:00	11:50:00	Standing moving	Forehead	0.422811	5.052	6.8008	2.87545
	66	2005-08-05	Verbier	46.0993	7.22975	Building	10:08:00	11:50:00	Standing moving	Neck	0.635172	2.908	6.8008	4.31968
	67	2005-08-05	Verbier	46.0993	7.22975	Building	10:08:00	11:50:00	Standing moving	Right shoulder	0.588281	1.456	6.8008	4.00078
	68	2005-08-05	Verbier	46.0993	7.22975	Building	10:08:00	11:50:00	Standing moving	Left shoulder	0.588281	0	6.8008	4.00078
	69	2005-08-05	Verbier	46.0993	7.22975	Building	10:08:00	11:50:00	Standing moving	Low back	0.523349	0.64	6.8008	3.55919
	70	2005-08-05	Verbier	46.0993	7.22975	Building	11:09:00	11:50:00	Standing moving	Left shoulder	0.588281	1.76	4.14404	2.43786
	71	2005-08-05	Verbier	46.0993	7.22975	Building	11:09:00	11:50:00	Standing moving	Right shoulder	0.588281	0.956	4.14404	2.43786
	72	2005-08-05	Verbier	46.0993	7.22975	Building	11:09:00	11:50:00	Standing moving	Neck	0.635172	1.076	4.14404	2.63218
	73	2005-08-05	Verbier	46.0993	7.22975	Building	11:09:00	11:50:00	Standing moving	Low back	0.523349	0.268	4.14404	2.16878
	74	2005-08-05	Verbier	46.0993	7.22975	Building	11:09:00	11:50:00	Standing moving	Forehead	0.422811	1.244	4.14404	1.75215
	75	2005-08-16	Montana	46.3122	7.48115	Building	10:16:00	11:58:00	Standing bowing	Neck	0.785035	2.432	7.41344	5.81981
	76	2005-08-16	Montana	46.3122	7.48115	Building	10:16:00	11:58:00	Standing bowing	Right shoulder	0.604719	2.968	7.41344	4.48305
	77	2005-08-16	Montana	46.3122	7.48115	Building	10:16:00	11:58:00	Standing bowing	Forehead	0.165619	2.148	7.41344	1.22781
	78	2005-08-16	Montana	46.3122	7.48115	Building	10:16:00	11:58:00	Standing bowing	Low back	0.839682	1.456	7.41344	6.22493
	79	2005-08-16	Montana	46.3122	7.48115	Building	10:16:00	11:58:00	Standing bowing	Left shoulder	0.604719	2.088	7.41344	4.48305
	80	2005-08-16	Montana	46.3122	7.48115	Building	10:11:00	11:55:00	Standing bowing	Right shoulder	0.604719	2.48	7.44109	4.49977
	81	2005-08-16	Montana	46.3122	7.48115	Building	10:11:00	11:55:00	Standing bowing	Neck	0.785035	1.164	7.44109	5.84152
	82	2005-08-16	Montana	46.3122	7.48115	Building	10:11:00	11:55:00	Standing bowing	Low back	0.839682	1.376	7.44109	6.24815
	83	2005-08-16	Montana	46.3122	7.48115	Building	10:11:00	11:55:00	Standing bowing	Left shoulder	0.604719	3.656	7.44109	4.49977
	84	2005-08-16	Montana	46.3122	7.48115	Building	10:11:00	11:55:00	Standing bowing	Forehead	0.165619	1.724	7.44109	1.23238
	85	2005-08-16	Montana	46.3122	7.48115	Building	14:03:00	16:01:00	Standing bowing	Right shoulder	0.604719	1.724	11.6292	7.03239
	86	2005-08-16	Montana	46.3122	7.48115	Building	14:03:00	16:01:00	Standing bowing	Left shoulder	0.604719	2.48	11.6292	7.03239
	87	2005-08-16	Montana	46.3122	7.48115	Building	14:03:00	16:01:00	Standing bowing	Neck	0.785035	1.532	11.6292	9.12932
	88	2005-08-16	Montana	46.3122	7.48115	Building	14:03:00	16:01:00	Standing bowing	Low back	0.839682	2.456	11.6292	9.76482
	89	2005-08-16	Montana	46.3122	7.48115	Building	14:03:00	16:01:00	Standing bowing	Forehead	0.165619	2.012	11.6292	1.92601
	90	2005-08-16	Montana	46.3122	7.48115	Building	13:57:00	16:01:00	Standing bowing	Left shoulder	0.604719	1.356	12.3098	7.44394
	91	2005-08-16	Montana	46.3122	7.48115	Building	13:57:00	16:01:00	Standing bowing	Right shoulder	0.604719	2.748	12.3098	7.44394
	92	2005-08-16	Montana	46.3122	7.48115	Building	13:57:00	16:01:00	Standing bowing	Neck	0.785035	0.712	12.3098	9.66359
	93	2005-08-16	Montana	46.3122	7.48115	Building	13:57:00	16:01:00	Standing bowing	Low back	0.839682	1.14	12.3098	10.3363
	94	2005-08-16	Montana	46.3122	7.48115	Building	13:57:00	16:01:00	Standing bowing	Forehead	0.165619	1.076	12.3098	2.03873
	95	2005-08-29	Montana	46.3122	7.48115	Building	09:24:00	11:52:00	Standing bowing	Neck	0.793132	4.46	7.85585	6.23073
	96	2005-08-29	Montana	46.3122	7.48115	Building	09:24:00	11:52:00	Standing bowing	Right shoulder	0.612816	2.212	7.85585	4.81419
	97	2005-08-29	Montana	46.3122	7.48115	Building	09:24:00	11:52:00	Standing bowing	Left shoulder	0.612816	1.076	7.85585	4.81419
	98	2005-08-29	Montana	46.3122	7.48115	Building	09:24:00	11:52:00	Standing bowing	Low back	0.84778	1.292	7.85585	6.66003
	99	2005-08-29	Montana	46.3122	7.48115	Building	09:24:00	11:52:00	Standing bowing	Forehead	0.173716	2.748	7.85585	1.36469
	100	2005-08-29	Montana	46.3122	7.48115	Building	09:26:00	11:52:00	Standing bowing	Neck	0.793132	2.3	7.80521	6.19057
	101	2005-08-29	Montana	46.3122	7.48115	Building	09:26:00	11:52:00	Standing bowing	Left shoulder	0.612816	1.14	7.80521	4.78316
	102	2005-08-29	Montana	46.3122	7.48115	Building	09:26:00	11:52:00	Standing bowing	Right shoulder	0.612816	1.964	7.80521	4.78316
	103	2005-08-29	Montana	46.3122	7.48115	Building	09:26:00	11:52:00	Standing bowing	Low back	0.84778	1.356	7.80521	6.6171
	104	2005-08-29	Montana	46.3122	7.48115	Building	09:26:00	11:52:00	Standing bowing	Forehead	0.173716	1.244	7.80521	1.35589
	105	2005-09-05	Bieudron	46.1943	7.27861	Building	10:05:00	11:40:00	Standing moving	Neck	0.653989	1.544	2.7989	1.83045
	106	2005-09-05	Bieudron	46.1943	7.27861	Building	10:05:00	11:40:00	Standing moving	Forehead	0.441628	2.12	2.7989	1.23607
	107	2005-09-05	Bieudron	46.1943	7.27861	Building	10:05:00	11:40:00	Standing moving	Right shoulder	0.607098	0.836	2.7989	1.6992
	108	2005-09-05	Bieudron	46.1943	7.27861	Building	10:05:00	11:40:00	Standing moving	Left shoulder	0.607098	0	2.7989	1.6992
	109	2005-09-05	Bieudron	46.1943	7.27861	Building	10:05:00	11:40:00	Standing moving	Low back	0.542166	1.592	2.7989	1.51747
	110	2005-09-05	Bieudron	46.1943	7.27861	Building	10:00:00	11:40:00	Standing moving	Neck	0.653989	0.636	2.95641	1.93346
	111	2005-09-05	Bieudron	46.1943	7.27861	Building	10:00:00	11:40:00	Standing moving	Forehead	0.441628	1.196	2.95641	1.30563
	112	2005-09-05	Bieudron	46.1943	7.27861	Building	10:00:00	11:40:00	Standing moving	Left shoulder	0.607098	0.844	2.95641	1.79483
	113	2005-09-05	Bieudron	46.1943	7.27861	Building	10:00:00	11:40:00	Standing moving	Right shoulder	0.607098	0.92	2.95641	1.79483
	114	2005-09-05	Bieudron	46.1943	7.27861	Building	10:00:00	11:40:00	Standing moving	Low back	0.542166	0	2.95641	1.60286
	115	2005-09-05	Bieudron	46.1943	7.27861	Building	13:18:00	15:58:00	Standing moving	Left shoulder	0.607098	0.552	5.31041	3.22394
	116	2005-09-05	Bieudron	46.1943	7.27861	Building	13:18:00	15:58:00	Standing moving	Right shoulder	0.607098	1.788	5.31041	3.22394
	117	2005-09-05	Bieudron	46.1943	7.27861	Building	13:18:00	15:58:00	Standing moving	Neck	0.653989	1.496	5.31041	3.47295
	118	2005-09-05	Bieudron	46.1943	7.27861	Building	13:18:00	15:58:00	Standing moving	Low back	0.542166	0.56	5.31041	2.87912
	119	2005-09-05	Bieudron	46.1943	7.27861	Building	13:18:00	15:58:00	Standing moving	Forehead	0.441628	1.108	5.31041	2.34523
	120	2005-09-05	Bieudron	46.1943	7.27861	Building	13:15:00	15:58:00	Standing moving	Neck	0.653989	1.68	5.47375	3.57977
	121	2005-09-05	Bieudron	46.1943	7.27861	Building	13:15:00	15:58:00	Standing moving	Low back	0.542166	0.692	5.47375	2.96768
	122	2005-09-05	Bieudron	46.1943	7.27861	Building	13:15:00	15:58:00	Standing moving	Left shoulder	0.607098	1.72	5.47375	3.3231
	123	2005-09-05	Bieudron	46.1943	7.27861	Building	13:15:00	15:58:00	Standing moving	Right shoulder	0.607098	1.416	5.47375	3.3231
	124	2005-09-05	Bieudron	46.1943	7.27861	Building	13:15:00	15:58:00	Standing moving	Forehead	0.441628	1.68	5.47375	2.41736
	125	2005-09-15	Bieudron	46.1943	7.27861	Building	13:34:00	15:54:00	Standing moving	Left shoulder	0.613884	1.76	9.98223	6.12793
	126	2005-09-15	Bieudron	46.1943	7.27861	Building	13:34:00	15:54:00	Standing moving	Neck	0.660775	1.492	9.98223	6.59601
	127	2005-09-15	Bieudron	46.1943	7.27861	Building	13:34:00	15:54:00	Standing moving	Forehead	0.448415	1.616	9.98223	4.47618
	128	2005-09-15	Bieudron	46.1943	7.27861	Building	13:34:00	15:54:00	Standing moving	Right shoulder	0.613884	1.844	9.98223	6.12793
